# Supplementary material for: The Bark Beetle Dendroctonus rhizophagus (Curculionidae: Scolytinae) Has Digestive Capacity to Degrade Complex Substrates: Functional Characterization and Heterologous Expression of an α-Amylase
Source: MDPI journal article supplement (doi:10.3390/ijms22010036), 2020-12-22
Supplement: s1 [file s1]

| <i>Tenebrio molitor</i>          | 1JAE:A PDBID   | 1 | TT | β1 | TT | α1 | β2 | TT | α2 |   |   |   |   |   |   |   |   |   |   |   |   |   |   |   |   |   |   |   |   |   |   |   |   |   |   |   |   |   |   |   |   |   |   |   |   |   |   |     |     |     |     |     |   |   |   |   |   |   |   |
|----------------------------------|----------------|---|----|----|----|----|----|----|----|---|---|---|---|---|---|---|---|---|---|---|---|---|---|---|---|---|---|---|---|---|---|---|---|---|---|---|---|---|---|---|---|---|---|---|---|---|---|-----|-----|-----|-----|-----|---|---|---|---|---|---|---|
| <i>Tenebrio molitor</i>          | 1JAE:A PDBID   | E | K  | D  | A  | N  | F  | A  | S  | G | R | N | S | I | V | H | L | F | E | W | K | N | D | I | A | E | C | E | R | E | L | Q | P | Q | G | F | G | V | H | I | S | P | P | N | E | X | L | V   | A   | ... | D   | G   | R | P | W | W |   |   |   |
| <i>Dendroctonus rhizophagus</i>  | MN782509       | Q | H  | D  | P  | H  | F  | L  | D  | G | K | N | T | I | V | H | L | F | E | W | K | W | S | D | I | A | E | C | E | N | E | L | S | K | K | G | F | A | G | V | I | S | P | P | S | E | N | A   | V   | V   | ... | E   | G | R | P | W | W |   |   |
| <i>Dendroctonus valens</i>       | MN782510       | Q | H  | D  | P  | H  | F  | L  | D  | G | K | N | T | I | V | H | L | F | E | W | K | W | S | D | I | A | E | C | E | N | E | L | S | K | K | G | F | A | G | V | I | S | P | P | S | E | N | A   | V   | V   | ... | E   | G | R | P | W | W |   |   |
| <i>Dendroctonus frontalis</i>    | GAF101015829.1 | Q | H  | D  | P  | H  | F  | L  | E  | G | K | N | S | I | V | H | L | F | E | W | K | W | S | D | I | A | E | C | E | N | E | L | S | K | K | G | F | A | G | V | I | S | P | P | S | E | N | A   | V   | V   | ... | E   | G | R | P | W | W |   |   |
| <i>Dendroctonus ponderosae</i>   | XP_019767850.1 | Q | H  | D  | P  | H  | F  | L  | E  | G | K | N | T | I | V | H | L | F | E | W | K | W | S | D | I | A | E | C | E | N | E | L | S | K | K | G | F | A | G | V | I | S | P | P | S | E | N | A   | V   | V   | ... | E   | G | R | P | W | W |   |   |
| <i>Anthonomus grandis</i>        | AAN77138.1     | Q | H  | D  | P  | H  | F  | L  | E  | G | R | S | T | I | V | H | L | F | E | W | K | W | A | D | I | A | E | C | E | N | E | L | S | K | K | G | F | A | G | V | I | S | P | P | S | E | N | A   | V   | V   | ... | S   | G | R | P | W | W |   |   |
| <i>Hypothenemus hampei</i>       | AHY03307.1     | Q | H  | D  | P  | H  | F  | A  | D  | G | R | N | T | I | V | H | L | F | E | W | K | W | D | I | A | E | C | E | N | E | L | S | K | K | G | F | A | G | V | I | S | P | P | S | E | N | P | I   | V   | ... | E   | G   | R | P | W | W |   |   |   |
| <i>Ips typographus</i>           | ADQ54210.1     | Q | H  | D  | P  | H  | F  | E  | N  | G | R | N | T | I | V | H | L | F | E | W | K | W | S | D | I | A | E | C | E | N | E | L | S | K | K | A | Y | A | G | V | I | S | P | P | S | E | N | P   | K   | V   | ... | E   | G | R | P | W | W |   |   |
| <i>Ips typographus</i>           | ADQ54211.1     | Q | H  | D  | P  | H  | F  | E  | D  | G | R | N | T | I | V | H | L | F | E | W | K | W | S | D | I | A | E | C | E | N | E | L | S | K | K | A | Y | A | G | V | I | S | P | P | S | E | N | P   | K   | V   | ... | E   | G | R | P | W | W |   |   |
| <i>Odoiporus longicollis</i>     | AHN92452.2     | Q | K  | D  | P  | Y  | F  | W  | E  | G | R | N | T | I | V | H | L | F | E | W | K | H | V | D | V | A | E | C | E | N | E | L | S | K | K | G | F | G | G | V | Q | V | S | P | P | S | E | N   | A   | I   | V   | ... | E | G | R | P | W | W |   |
| <i>Cosmopolites sordidus</i>     | AKN63428.1     | Q | K  | D  | S  | Q  | F  | W  | E  | G | R | N | T | I | V | H | L | F | E | W | K | H | V | D | V | A | E | C | E | N | E | L | S | K | K | G | F | G | G | V | Q | V | S | P | P | S | E | N   | A   | I   | V   | ... | E | G | R | P | W | W |   |
| <i>Sitophilus oryzae</i>         | ADM73187.1     | Q | K  | D  | P  | H  | F  | L  | D  | G | R | N | T | I | V | H | L | F | E | W | K | W | D | I | A | E | C | E | N | E | L | S | V | K | N | F | A | G | V | Q | V | S | P | P | A | E | S | V   | V   | ... | E   | G   | R | P | W | W |   |   |   |
| <i>Anoplophora glabripennis</i>  | XP_018575975.1 | Q | K  | N  | N  | N  | F  | E  | T  | G | R | N | T | I | V | H | L | F | E | W | K | W | S | D | I | A | E | C | E | N | E | L | G | P | K | G | F | A | G | V | I | S | P | P | S | E | N | E   | V   | I   | V   | Q   | N | G | D | R | P | W | W |
| <i>Callosobruchus chinensis</i>  | BAD83655.1     | Q | K  | N  | N  | N  | F  | V  | P  | G | R | N | S | I | V | Q | M | F | E | W | R | W | D | I | A | E | C | E | T | I | F | G | P | K | G | F | A | G | V | I | S | P | P | S | E | N | I | V   | ... | N   | G   | R   | P | W | W |   |   |   |   |
| <i>Aethina tumida</i>            | XP_019881963.1 | Q | K  | D  | P  | H  | F  | A  | D  | D | R | S | V | I | V | H | L | F | E | W | K | H | V | D | V | A | E | C | E | R | I | L | G | P | K | G | F | A | G | V | I | S | P | P | N | E | N | I   | V   | ... | S   | S   | S | N | R | P | W | W |   |
| <i>Leptinotarsa decemlineata</i> | XP_023015287.1 | Q | K  | N  | N  | N  | F  | A  | N  | G | R | S | A | I | V | H | L | F | E | W | K | W | D | I | A | E | C | E | N | E | L | G | P | K | G | F | A | G | V | I | S | P | P | S | E | N | A | I   | V   | ... | G   | D   | R | P | W | W |   |   |   |
| <i>Diabrotica virgifera</i>      | AAG23133.1     | Q | K  | D  | N  | H  | F  | A  | Q  | G | R | N | T | I | V | H | L | F | E | W | H | W | D | I | A | E | C | E | N | E | L | G | P | K | G | F | A | G | V | Q | V | S | P | P | S | E | N | S   | V   | I   | ... | G   | D | R | P | W | W |   |   |
| <i>Anthonomus grandis</i>        | AAN77139.1     | Q | K  | N  | P  | N  | F  | V  | D  | G | R | G | T | I | V | H | L | F | D | T | W | S | D | I | A | E | C | E | N | E | L | G | P | N | G | F | G | G | V | Q | T | S | P | P | N | E | I | W   | Q   | N   | D   | R   | P | W | W |   |   |   |   |
| <i>Callosobruchus chinensis</i>  | ANC73389.1     | Q | K  | N  | N  | N  | F  | H  | P  | G | R | N | S | I | Q | M | F | E | W | R | W | D | I | A | E | C | E | K | I | F | G | P | R | G | F | A | G | V | I | S | P | P | S | E | N | I | V | ... | N   | A   | R   | P   | W | W |   |   |   |   |   |
| <i>Zabrotes subfasciatus</i>     | AAF73435.1     | Q | K  | N  | S  | N  | F  | Q  | P  | G | R | N | S | I | V | Q | M | F | E | W | N | G | N | L | A | K | E | C | E | T | I | L | G | P | K | G | F | A | G | V | I | S | P | P | N | E | N | V   | V   | ... | G   | D   | E | G | R | P | W | W |   |
| <i>Tribolium castaneum</i>       | AGW27506.1     | Q | R  | D  | P  | H  | F  | A  | A  | D | R | N | S | I | V | H | L | F | E | W | K | W | S | D | I | A | E | C | E | R | I | L | A | P | K | G | F | G | G | V | I | S | P | P | N | E | N | L   | V   | ... | T   | S   | S | N | R | P | W | W |   |
| <i>Tribolium castaneum</i>       | AGW27505.1     | Q | K  | D  | P  | H  | F  | A  | A  | D | R | N | S | I | V | H | L | F | E | W | K | W | S | D | I | A | E | C | E | R | I | L | A | P | K | G | F | G | G | V | Q | V | S | P | P | N | E | N   | L   | V   | ... | T   | S | S | N | R | P | W | W |
| <i>Tribolium castaneum</i>       | XP_969234.1    | Q | K  | D  | P  | H  | F  | A  | A  | D | R | N | S | I | V | H | L | F | E | W | K | W | S | D | I | A | E | C | E | R | I | L | A | P | K | G | F | G | G | V | I | S | P | P | N | E | N | L   | V   | ... | T   | S   | S | N | R | P | W | W |   |
| <i>Tribolium castaneum</i>       | NP_001107848.1 | Q | K  | D  | P  | H  | F  | A  | A  | D | R | N | S | I | V | H | L | F | E | W | K | W | S | D | I | A | E | C | E | R | I | L | A | P | K | G | F | G | G | V | I | S | P | P | N | E | N | L   | V   | ... | T   | S   | S | N | R | P | W | W |   |
| <i>Blaps mucronata</i>           | AAO14612.1     | Q | K  | I  | A  | N  | F  | A  | D  | G | R | N | T | I | V | H | L | F | E | W | K | W | N | D | I | A | E | C | E | R | I | L | G | P | K | G | F | G | G | V | I | S | P | P | N | E | Y | L   | V   | I   | ... | A   | D | S | G | R | P | W | W |
| <i>Tribolium castaneum</i>       | AAA03708.1     | Q | K  | D  | P  | H  | F  | A  | A  | D | R | N | S | I | V | H | L | F | E | W | K | W | S | D | I | A | E | C | E | R | I | L | A | P | K | G | F | G | G | V | I | S | P | P | N | E | N | L   | V   | ... | T   | S   | S | N | R | P | W | W |   |
| <i>Tribolium castaneum</i>       | AGW27504.1     | Q | K  | D  | P  | H  | F  | A  | A  | D | R | N | S | I | V | H | L | F | E | W | K | W | S | D | I | A | E | C | E | R | I | L | A | P | K | G | F | G | G | V | I | S | P | P | N | E | N | L   | V   | ... | T   | S   | S | N | R | P | W | W |   |
| <i>Diabrotica virgifera</i>      | AAF20998.1     | Q | K  | K  | N  | H  | F  | A  | G  | G | R | N | T | I | V | Q | L | F | E | W | H | W | D | I | A | E | C | E | N | E | L | G | P | K | G | F | A | G | V | Q | V | S | P | P | N | E | N | C   | V   | ... | N   | G   | R | P | W | W |   |   |   |
| <i>Tribolium castaneum</i>       | AAA03709.1     | Q | K  | D  | P  | H  | F  | A  | A  | D | R | N | S | I | V | H | L | F | E | W | K | W | S | D | I | A | E | C | E | R | I | L | A | P | K | G | F | G | G | V | I | S | P | P | N | E | N | L   | V   | ... | T   | S   | S | N | R | P | W | W |   |
| <i>Aethina tumida</i>            | XP_019881962.1 | Q | K  | N  | P  | L  | F  | A  | D  | G | R | S | V | I | V | H | L | F | E | W | K | W | E | D | I | A | E | C | E | R | I | L | G | P | K | G | F | G | G | V | I | S | P | P | N | E | N | L   | V   | ... | S   | A   | N | N | R | P | W | W |   |
| <i>Tribolium castaneum</i>       | XP_975485.1    | Q | K  | D  | P  | H  | F  | A  | A  | D | R | N | T | I | V | H | L | F | E | W | K | W | S | D | I | A | E | C | E | R | I | L | A | P | K | G | F | G | G | V | I | S | P | P | N | E | N | L   | V   | ... | T   | S   | S | N | R | P | W | W |   |
| <i>Tenebrio molitor</i>          | 1VIW:A PDBID   | X | K  | D  | A  | N  | F  | A  | S  | G | R | N | S | I | V | H | L | F | E | W | K | W | N | D | I | A | E | C | E | R | I | L | Q | P | Q | G | F | G | V | H | I | S | P | P | N | E | X | L   | V   | A   | ... | D   | G | R | P | W | W |   |   |
| <i>Tenebrio molitor</i>          | 1TMQ:A PDBID   | X | K  | D  | A  | N  | F  | A  | S  | G | R | N | S | I | V | H | L | F | E | W | K | W | N | D | I | A | E | C | E | R | I | L | Q | P | Q | G | F | G | V | H | I | S | P | P | N | E | X | L   | V   | A   | ... | D   | G | R | P | W | W |   |   |
| <i>Phaedon cochleariae</i>       | O97396.1       | Q | K  | N  | N  | N  | F  | A  | P  | G | R | N | T | I | V | H | L | F | E | W | H | W | D | I | A | E | C | E | N | E | L | G | P | K | G | F | A | G | V | Q | V | S | P | P | A | E | N | T   | V   | I   | ... | G   | D | R | P | W | W |   |   |
| <i>Agrius planipennis</i>        | XP_018335150.1 | Q | W  | D  | N  | H  | W  | Q  | A  | G | R | S | T | I | V | H | L | F | E | W | K | W | D | I | A | E | C | E | R | I | L | A | P | K | G | Y | A | G | V | I | S | P | P | S | E | N | V | I   | T   | D   | Q   | A   | Y | R | P | W | W |   |   |
| <i>Onthophagus taurus</i>        | XP_022909394.1 | Q | F  | N  | T  | N  | M  | W  | D  | N | R | D | T | M | V | H | L | F | E | W | K | F | S | D | V | A | E | C | E | R | I | L | Q | H | K | G | Y | G | V | L | S | P | V | S | E | N | A | I   | V   | ... | D   | K   | R | P | W | W |   |   |   |
| <i>Nicrophorus vespilloides</i>  | XP_017774160.1 | Y | K  | N  | P  | N  | F  | W  | D  | D | R | N | S | I | V | H | L | F | E | W | K | W | N | D | I | A | E | C | E | R | I | L | Q | K | K | G | Y | G | V | Q | V | S | P | N | E | N | I | V   | ... | P   | N   | R   | P | W | W |   |   |   |   |
| <i>Spodoptera frugiperda</i>     | AAO13754.1     | Y | K  | N  | P  | H  | Y  | A  | S  | G | R | T | T | M | V | H | L | F | E | W | K | W | D | I | A | E | C | E | T | I | L | G | P | R | G | Y | G | H | O | I | S | P | P | N | E | N | L | A   | I   | ... | W   | S   | R | O | R | P | W | W |   |



| <i>Tenebrio molitor</i>          | 1JAE : A   PDBID | 120         | $\eta 2$<br>000 | 130        | 140       | $\alpha 3$<br>00000 | 150        | 160      | $\alpha 4$<br>000000000 | 170    |
|----------------------------------|------------------|-------------|-----------------|------------|-----------|---------------------|------------|----------|-------------------------|--------|
| <i>Tenebrio molitor</i>          | 1JAE : A   PDBID | DGMNYP      | PAVPY           | GSGDFH     | SPCEVNNYQ | DADNVRNCEL          | VGLRDLN    | QSDYVVRG | VGLIDYM                 |        |
| <i>Dendroctonus rhizophagus</i>  | MN782509         | SSKSYPAVSY  | SEENFH          | TSCDI      | DYN       | DAASIRNCEL          | SGLKDL     | QSDYVVRG | KIIEYM                  |        |
| <i>Dendroctonus valens</i>       | MN782510         | SSKSYPAVSY  | SEENFH          | TSCDI      | DYN       | DAASIRNCEL          | SGLKDL     | QSDYVVRG | KIIEYM                  |        |
| <i>Dendroctonus frontalis</i>    | GAF101015829.1   | SSKSYPAVSY  | SEENFH          | TSCDI      | DYN       | DAASIRNCEL          | SGLKDL     | QSDYVVRG | KIIEYM                  |        |
| <i>Dendroctonus ponderosae</i>   | XP_019767850.1   | SSKSYPAVSY  | SEENFH          | TSCDI      | DYN       | DAASIRNCEL          | SGLKDL     | QSDYVVRG | KIIEYM                  |        |
| <i>Anthonomus grandis</i>        | AAN77138.1       | GSKSYPAVSY  | SEENFH          | ATCDI      | NYN       | DAASIRNCEL          | SGLKDL     | QSDYVVRG | KIIEYM                  |        |
| <i>Hypothenemus hampei</i>       | AHY03307.1       | GSKSYPAVSY  | SEENFH          | ASCDI      | DYN       | DAASIRNCEL          | SGLKDL     | QSDYVVRG | KIIEYM                  |        |
| <i>Ips typographus</i>           | ADQ54210.1       | DTKSYPTVPY  | TSENFH          | TSCDI      | DYT       | DAASIRNCEL          | SGLKDL     | QSDYVVRG | KIIEYM                  |        |
| <i>Ips typographus</i>           | ADQ54211.1       | DTKSYPAVSY  | SEENFH          | PSCDI      | DYS       | DAASIRNCEL          | SGLKDL     | QSDYVVRG | KIIEYM                  |        |
| <i>Odoiporus longicollis</i>     | AHN92452.2       | GSKSYPAVSY  | SEENFH          | PSCDI      | DYS       | DAASIRNCEL          | SGLKDL     | QSDYVVRG | KIIEYM                  |        |
| <i>Cosmopolites sordidus</i>     | AKN63428.1       | GSKSYPAVSY  | SEENFH          | PTCDI      | NYN       | DAASIRNCEL          | SGLKDL     | QSDYVVRG | KIIEYM                  |        |
| <i>Sitophilus oryzae</i>         | ADM73187.1       | SSKSYPAVSY  | TSENFH          | TSCDI      | DYT       | DSSSIRNCEL          | TGLKDL     | QSDYVVRG | KIIEYM                  |        |
| <i>Anoplophora glabripennis</i>  | XP_018575975.1   | DSKSYPGVPY  | GSDNFH          | TCTVNNYQ   |           | DAENVRNCEL          | VGLKDL     | QSDYVVRG | KIIEYM                  |        |
| <i>Callosobruchus chinensis</i>  | BAD83655.1       | GSRSYPTVPY  | GSDNFH          | KSCPINN    | NYN       | DPAEVRNCEL          | VGLKDL     | QSDYVVRG | KIIEYM                  |        |
| <i>Aethina tumida</i>            | XP_019881963.1   | DNKKFPGVSY  | GSDNFH          | ASCRI      | DNYQ      | DAENVRNCEL          | VGLKDL     | QSDYVVRG | KIIEYM                  |        |
| <i>Leptinotarsa decemlineata</i> | XP_023015287.1   | GSKYFPAVPY  | NSDDFH          | PTCTVNNYQ  |           | DAANVRNCEL          | VGLKDL     | QSDYVVRG | KIIEYM                  |        |
| <i>Diabrotica virgifera</i>      | AAG23133.1       | GSLSYSPVFPY | GSDNFH          | SKDCTVNNYQ |           | DANNIRNCEL          | SGLKDL     | QSDYVVRG | KIIEYM                  |        |
| <i>Anthonomus grandis</i>        | AAN77139.1       | TNRDYP      | PAVPY           | TIEH       | FTCG      | DYN                 | SPSAIRNCEL | SGLKDL   | QSDYVVRG                | KIIEYM |
| <i>Callosobruchus chinensis</i>  | ANC73389.1       | GSRSYPAVPY  | GSDNFH          | KSCPINN    | NYN       | DPAEVRNCEL          | VGLKDL     | QSDYVVRG | KIIEYM                  |        |
| <i>Zabrotes subfasciatus</i>     | AAF73435.1       | SKKSYPAVPY  | GSDNFH          | PDCMINN    | NYQ       | DVNNVRNCEL          | VGLKDL     | QSDYVVRG | KIIEYM                  |        |
| <i>Tribolium castaneum</i>       | AGW27506.1       | DGKNYP      | PAVPY           | GSDNFH     | DSC       | TVNNYQ              | DASNVRNCEL | VGLKDL   | QSDYVVRG                | KIIEYM |
| <i>Tribolium castaneum</i>       | AGW27505.1       | DGKNYP      | PAVPY           | GSDNFH     | DSC       | TVNNYQ              | DASNVRNCEL | VGLKDL   | QSDYVVRG                | KIIEYM |
| <i>Tribolium castaneum</i>       | XP_969234.1      | DGKNYP      | PAVPY           | GSDNFH     | DSC       | TVNNYQ              | DASNVRNCEL | VGLKDL   | QSDYVVRG                | KIIEYM |
| <i>Tribolium castaneum</i>       | NP_001107848.1   | DGKNYP      | PAVPY           | GSDNFH     | DSC       | TVNNYQ              | DASNVRNCEL | VGLKDL   | QSDYVVRG                | KIIEYM |
| <i>Blaps mucronata</i>           | AAO14612.1       | AGKNYP      | PGVPY           | GSDNFH     | DSC       | AINNYQ              | DTNNVRNCEL | VGLKDL   | QSDYVVRG                | KIIEYM |
| <i>Tribolium castaneum</i>       | AAA03708.1       | DGKNYP      | PAVPY           | GSDNFH     | DSC       | TVNNYQ              | DASNVRNCEL | VGLKDL   | QSDYVVRG                | KIIEYM |
| <i>Tribolium castaneum</i>       | AGW27504.1       | DGKNYP      | PAVPY           | GSDNFH     | DSC       | TVNNYQ              | DASNVRNCEL | VGLKDL   | QSDYVVRG                | KIIEYM |
| <i>Diabrotica virgifera</i>      | AAF20998.1       | GSLSYPSVPY  | GSDNFH          | SRDCTINN   | NYQ       | ESHNIRNCEL          | VGLKDL     | QSDYVVRG | KIIEYM                  |        |
| <i>Tribolium castaneum</i>       | AAA03709.1       | DGKNYP      | PAVPY           | GSDNFH     | DSC       | TVNNYQ              | DASNVRNCEL | VGLKDL   | QSDYVVRG                | KIIEYM |
| <i>Aethina tumida</i>            | XP_019881962.1   | GNKQFPGIPY  | GSDNFH          | DSC        | AINNYQ    | DASNVRNCEL          | VGLKDL     | QSDYVVRG | KIIEYM                  |        |
| <i>Tribolium castaneum</i>       | XP_975485.1      | DGKNYP      | PAVPY           | GSDNFH     | DSC       | TVNNYQ              | DASNVRNCEL | VGLKDL   | QSDYVVRG                | KIIEYM |
| <i>Tenebrio molitor</i>          | 1VIW : A   PDBID | DGMNYP      | PAVPY           | GSGDFH     | SPCEVNNYQ | DADNVRNCEL          | VGLRDLN    | QSDYVVRG | VGLIDYM                 |        |
| <i>Tenebrio molitor</i>          | 1TMQ : A   PDBID | DGMNYP      | PAVPY           | GSGDFH     | SPCEVNNYQ | DADNVRNCEL          | VGLRDLN    | QSDYVVRG | VGLIDYM                 |        |
| <i>Phaedon cochleariae</i>       | O97396.1         | EPSASPAVPY  | GSGDFH          | GRCTSN     | NYQ       | DPNNIRNCEL          | SGLKDL     | QSDYVVRG | KIIEYM                  |        |
| <i>Agrilus planipennis</i>       | XP_018335150.1   | SSEYPAVPY   | HAERFH          | PCS        | VNNYQ     | DANNVRNCEL          | SGLKDL     | QSDYVVRG | KIIEYM                  |        |
| <i>Onthophagus taurus</i>        | XP_022909394.1   | AIKSYPAVPY  | SAPDN           | SDCA       | ITDYN     | NAENVRNCEL          | VGLRDLH    | QSDYVVRG | KIIEYM                  |        |
| <i>Nicrophorus vespilloides</i>  | XP_017774160.1   | GSKEYPAVPY  | GPNDFH          | PDC        | SINN      | NATEVRDCEL          | VGLKDL     | QSDYVVRG | KIIEYM                  |        |
| <i>Spodoptera frugiperda</i>     | AAO13754.1       | GNWGYPGVPY  | GRNDFH          | NWPH       | CVIQ      | HDYGC               | CADRVNCEL  | SGLKDL   | QSDYVVRG                | KIIEYM |

| Tenebrio molitor          |                  | 1JAE : A   PDBID | 00000 | β8     | η3     | α5   | η4     | TT     | β9    | 220    | 230    |      |      |      |
|---------------------------|------------------|------------------|-------|--------|--------|------|--------|--------|-------|--------|--------|------|------|------|
|                           |                  |                  | 180   | 190    | 200    | 210  | 220    | 230    | 240   | 250    | 260    |      |      |      |
| Tenebrio molitor          | 1JAE : A   PDBID | NHMLD            | LGVA  | GFRVDA | KHMS   | PGDL | SVIFSG | LKNTD  | YGFAD | GARPFI | YQEV   | IDLG | GEAI |      |
| Dendroctonus rhizophagus  | MN782509         | NHMLD            | LGVA  | GFRVDA | KHMS   | PGDL | SVIFSG | LKNTD  | YGFAD | GARPFI | YQEV   | IDLG | GEAI |      |
| Dendroctonus valens       | MN782510         | NHMLD            | LGVA  | GFRVDA | KHMS   | PGDL | SVIFSG | LKNTD  | YGFAD | GARPFI | YQEV   | IDLG | GEAI |      |
| Dendroctonus frontalis    | GAFI01015829.1   | NHMLD            | LGVA  | GFRVDA | KHMS   | PGDL | SVIFSG | LKNTD  | YGFAD | GARPFI | YQEV   | IDLG | GEAI |      |
| Dendroctonus ponderosae   | XP_019767850.1   | NHMLD            | LGVA  | GFRVDA | KHMS   | PGDL | SVIFSG | LKNTD  | YGFAD | GARPFI | YQEV   | IDLG | GEAI |      |
| Anthonomus grandis        | AAN77138.1       | NHMLD            | LGVA  | GFRVDA | KHMS   | PGDL | SVIFSG | LKNTD  | YGFAD | GARPFI | YQEV   | IDLG | GEAI |      |
| Hypothenemus hampei       | AHY03307.1       | NHMLD            | LGVA  | GFRVDA | KHMS   | PGDL | SVIFSG | LKNTD  | YGFAD | GARPFI | YQEV   | IDLG | GEAI |      |
| Ips typographus           | ADQ54210.1       | NHMLD            | LGVA  | GFRVDA | KHMS   | PGDL | SVIFSG | LKNTD  | YGFAD | GARPFI | YQEV   | IDLG | GEAI |      |
| Ips typographus           | ADQ54211.1       | NHMLD            | LGVA  | GFRVDA | KHMS   | PGDL | SVIFSG | LKNTD  | YGFAD | GARPFI | YQEV   | IDLG | GEAI |      |
| Odoiporus longicollis     | AHN92452.2       | NHMLD            | LGVA  | GFRVDA | KHMS   | PGDL | SVIFSG | LKNTD  | YGFAD | GARPFI | YQEV   | IDLG | GEAI |      |
| Cosmopolites sordidus     | AKN63428.1       | NHMLD            | LGVA  | GFRVDA | KHMS   | PGDL | SVIFSG | LKNTD  | YGFAD | GARPFI | YQEV   | IDLG | GEAI |      |
| Sitophilus oryzae         | ADM73187.1       | NHMLD            | LGVA  | GFRVDA | KHMS   | PGDL | SVIFSG | LKNTD  | YGFAD | GARPFI | YQEV   | IDLG | GEAI |      |
| Anoplophora glabripennis  | XP_018575975.1   | DQCV             | D     | LGVA   | GFRVDA | KHMS | PGDL   | SVIFSG | LKNTD | YGFAD  | GARPFI | YQEV | IDLG | GEAI |
| Callosobruchus chinensis  | BAD83655.1       | NHMLD            | LGVA  | GFRVDA | KHMS   | PGDL | SVIFSG | LKNTD  | YGFAD | GARPFI | YQEV   | IDLG | GEAI |      |
| Aethina tumida            | XP_019881963.1   | NHMLD            | LGVA  | GFRVDA | KHMS   | PGDL | SVIFSG | LKNTD  | YGFAD | GARPFI | YQEV   | IDLG | GEAI |      |
| Leptinotarsa decemlineata | XP_023015287.1   | DHLID            | D     | LGVA   | GFRVDA | KHMS | PGDL   | SVIFSG | LKNTD | YGFAD  | GARPFI | YQEV | IDLG | GEAI |
| Diabrotica virgifera      | AAG23133.1       | NHMLD            | LGVA  | GFRVDA | KHMS   | PGDL | SVIFSG | LKNTD  | YGFAD | GARPFI | YQEV   | IDLG | GEAI |      |
| Anthonomus grandis        | AAN77139.1       | NHMLD            | LGVA  | GFRVDA | KHMS   | PGDL | SVIFSG | LKNTD  | YGFAD | GARPFI | YQEV   | IDLG | GEAI |      |
| Callosobruchus chinensis  | ANC73389.1       | NHMLD            | LGVA  | GFRVDA | KHMS   | PGDL | SVIFSG | LKNTD  | YGFAD | GARPFI | YQEV   | IDLG | GEAI |      |
| Zabrotes subfasciatus     | AAF73435.1       | NHMLD            | LGVA  | GFRVDA | KHMS   | PGDL | SVIFSG | LKNTD  | YGFAD | GARPFI | YQEV   | IDLG | GEAI |      |
| Tribolium castaneum       | AGW27506.1       | NHMLD            | LGVA  | GFRVDA | KHMS   | PGDL | SVIFSG | LKNTD  | YGFAD | GARPFI | YQEV   | IDLG | GEAI |      |
| Tribolium castaneum       | AGW27505.1       | NHMLD            | LGVA  | GFRVDA | KHMS   | PGDL | SVIFSG | LKNTD  | YGFAD | GARPFI | YQEV   | IDLG | GEAI |      |
| Tribolium castaneum       | XP_969234.1      | NHMLD            | LGVA  | GFRVDA | KHMS   | PGDL | SVIFSG | LKNTD  | YGFAD | GARPFI | YQEV   | IDLG | GEAI |      |
| Tribolium castaneum       | NP_001107848.1   | NHMLD            | LGVA  | GFRVDA | KHMS   | PGDL | SVIFSG | LKNTD  | YGFAD | GARPFI | YQEV   | IDLG | GEAI |      |
| Blaps mucronata           | AAO14612.1       | NHMLD            | LGVA  | GFRVDA | KHMS   | PGDL | SVIFSG | LKNTD  | YGFAD | GARPFI | YQEV   | IDLG | GEAI |      |
| Tribolium castaneum       | AAA03708.1       | NHMLD            | LGVA  | GFRVDA | KHMS   | PGDL | SVIFSG | LKNTD  | YGFAD | GARPFI | YQEV   | IDLG | GEAI |      |
| Tribolium castaneum       | AGW27504.1       | NHMLD            | LGVA  | GFRVDA | KHMS   | PGDL | SVIFSG | LKNTD  | YGFAD | GARPFI | YQEV   | IDLG | GEAI |      |
| Diabrotica virgifera      | AAF20998.1       | NHMLD            | LGVA  | GFRVDA | KHMS   | PGDL | SVIFSG | LKNTD  | YGFAD | GARPFI | YQEV   | IDLG | GEAI |      |
| Tribolium castaneum       | AAA03709.1       | NHMLD            | LGVA  | GFRVDA | KHMS   | PGDL | SVIFSG | LKNTD  | YGFAD | GARPFI | YQEV   | IDLG | GEAI |      |
| Aethina tumida            | XP_019881962.1   | NHMLD            | LGVA  | GFRVDA | KHMS   | PGDL | SVIFSG | LKNTD  | YGFAD | GARPFI | YQEV   | IDLG | GEAI |      |
| Tribolium castaneum       | XP_975485.1      | NHMLD            | LGVA  | GFRVDA | KHMS   | PGDL | SVIFSG | LKNTD  | YGFAD | GARPFI | YQEV   | IDLG | GEAI |      |
| Tenebrio molitor          | 1VIW : A   PDBID | NHMLD            | LGVA  | GFRVDA | KHMS   | PGDL | SVIFSG | LKNTD  | YGFAD | GARPFI | YQEV   | IDLG | GEAI |      |
| Tenebrio molitor          | 1TMQ : A   PDBID | NHMLD            | LGVA  | GFRVDA | KHMS   | PGDL | SVIFSG | LKNTD  | YGFAD | GARPFI | YQEV   | IDLG | GEAI |      |
| Phaedon cochleariae       | O97396.1         | NHMLD            | LGVA  | GFRVDA | KHMS   | PGDL | SVIFSG | LKNTD  | YGFAD | GARPFI | YQEV   | IDLG | GEAI |      |
| Agrilus planipennis       | XP_018335150.1   | NKLLD            | LGVA  | GFRVDA | KHMS   | PGDL | SVIFSG | LKNTD  | YGFAD | GARPFI | YQEV   | IDLG | GEAI |      |
| Onthophagus taurus        | XP_022909394.1   | NKLLD            | LGVA  | GFRVDA | KHMS   | PGDL | SVIFSG | LKNTD  | YGFAD | GARPFI | YQEV   | IDLG | GEAI |      |
| Nicrophorus vespilloides  | XP_017774160.1   | NKLLD            | LGVA  | GFRVDA | KHMS   | PGDL | SVIFSG | LKNTD  | YGFAD | GARPFI | YQEV   | IDLG | GEAI |      |
| Spodoptera frugiperda     | AAO13754.1       | NHMLD            | LGVA  | GFRVDA | KHMS   | PGDL | SVIFSG | LKNTD  | YGFAD | GARPFI | YQEV   | IDLG | GEAI |      |



— \*

1







|                                  |                | <div> <div>β24</div> <div> <div>460</div> <div>470</div> </div> </div> |                  |
|----------------------------------|----------------|------------------------------------------------------------------------|------------------|
| <i>Tenebrio molitor</i>          | 1JAE:A PDBID   |                                                                        |                  |
| <i>Tenebrio molitor</i>          | 1JAE:A PDBID   | EDDG                                                                   | VLAIHVNAKL       |
| <i>Dendroctonus rhizophagus</i>  | MN782509       | DTDA                                                                   | AIATHVNAKL       |
| <i>Dendroctonus valens</i>       | MN782510       | DTDA                                                                   | AIATHVNAKL       |
| <i>Dendroctonus frontalis</i>    | GAFI01015829.1 | DSDA                                                                   | AVATHVNAKL       |
| <i>Dendroctonus ponderosae</i>   | XP_019767850.1 | DTDA                                                                   | AIATHANAKL       |
| <i>Anthonomus grandis</i>        | AAN77138.1     | DTNA                                                                   | AVATHVNAKC       |
| <i>Hypothenemus hampei</i>       | AHY03307.1     | DREA                                                                   | AVATHANAKL       |
| <i>Ips typographus</i>           | ADQ54210.1     | ESDT                                                                   | AVATHVNAKL       |
| <i>Ips typographus</i>           | ADQ54211.1     | ESDC                                                                   | VVAHVNAKL        |
| <i>Odoiporus longicollis</i>     | AHN92452.2     | ETDA                                                                   | AVATHVNAKL       |
| <i>Cosmopolites sordidus</i>     | AKN63428.1     | ESDA                                                                   | AVATHVNAKL       |
| <i>Sitophilus oryzae</i>         | ADM73187.1     | ELDA                                                                   | AVATHVNAKL       |
| <i>Anoplophora glabripennis</i>  | XP_018575975.1 | EDDG                                                                   | VLAIHVNAKL       |
| <i>Callosobruchus chinensis</i>  | BAD83655.1     | .VDG                                                                   | VLAIHVNSRLQSKL   |
| <i>Aethina tumida</i>            | XP_019881963.1 | EDDG                                                                   | VMAIHLGAKL       |
| <i>Leptinotarsa decemlineata</i> | XP_023015287.1 | GDDF                                                                   | VLAITHEESKL      |
| <i>Diabrotica virgifera</i>      | AAG23133.1     | EDDG                                                                   | VVAIHVNAKL       |
| <i>Anthonomus grandis</i>        | AAN77139.1     | GD EI                                                                  | AMATHVESKLS      |
| <i>Callosobruchus chinensis</i>  | ANC73389.1     | .LDG                                                                   | ALATHVNAKVQSKL   |
| <i>Zabrotes subfasciatus</i>     | AAF73435.1     | EPDG                                                                   | ILATHVSAKLTSKL   |
| <i>Tribolium castaneum</i>       | AGW27506.1     | EDDG                                                                   | VIAIHVNAKL       |
| <i>Tribolium castaneum</i>       | AGW27505.1     | EDDG                                                                   | VIAIHVNAKL       |
| <i>Tribolium castaneum</i>       | XP_969234.1    | EDDG                                                                   | VIAIHVNAKL       |
| <i>Tribolium castaneum</i>       | NP_001107848.1 | EDDG                                                                   | VIAIHVNAKL       |
| <i>Blaps mucronata</i>           | AAO14612.1     | EDDG                                                                   | VLAIHINAKV       |
| <i>Tribolium castaneum</i>       | AAA03708.1     | EDDG                                                                   | VIAIHVNAKL       |
| <i>Tribolium castaneum</i>       | AGW27504.1     | EDDG                                                                   | VIAIHVNAKL       |
| <i>Diabrotica virgifera</i>      | AAF20998.1     | EDDG                                                                   | VVAIHVNAKL       |
| <i>Tribolium castaneum</i>       | AAA03709.1     | EDDG                                                                   | VIAIHVNAKL       |
| <i>Aethina tumida</i>            | XP_019881962.1 | MRRMEF                                                                 |                  |
| <i>Tribolium castaneum</i>       | XP_975485.1    | EDDG                                                                   | VIAIHVNAKL       |
| <i>Tenebrio molitor</i>          | 1VIW:A PDBID   | EDDG                                                                   | VLAIHVNAKL       |
| <i>Tenebrio molitor</i>          | 1TMQ:A PDBID   | EDDG                                                                   | VLAIHVNAKL       |
| <i>Phaedon cochleariae</i>       | O97396.1       | EDDG                                                                   | FLATHVGAKV       |
| <i>Agritus planipennis</i>       | XP_018335150.1 | EDDG                                                                   | VLAIHINAKQS      |
| <i>Onthophagus taurus</i>        | XP_022909394.1 | EDDG                                                                   | VLAIHVNAKL       |
| <i>Nicrophorus vespilloides</i>  | XP_017774160.1 | EDDG                                                                   | VLAITHTNARL      |
| <i>Spodoptera frugiperda</i>     | AAO13754.1     | EFDM                                                                   | VLAITGPEVRIFVALS |
